# Supplementary material for: Segmental MRI Pituitary and Hypothalamus Volumes post Fontan: An analysis of the Australian and New Zealand Fontan Registry
Source: bioRxiv or medRxiv preprint supplement (doi:10.1101/2024.07.05.24309972), 2024-07-05
Supplement: Supplementary file [file media-1.pdf]

## SUPPLEMENTAL MATERIAL:

### Supplemental Methods:

#### *Brain MRI Acquisition*

Brain MRI data was acquired using Siemens 3Tesla MRI scanners: RCH (TrioTim), RPAH (Skyra), CHW (Verio), and NZ (Skyra). The sequences used for segmentation included 3D T1-weighted imaging and 2D T2-weighted spin echo imaging reconstructed in three standard orthogonal planes. T2-weighted Fluid Attenuated Inversion Recovery (FLAIR) sequence, diffusion-weighted imaging (DWI), and Susceptibility-Weighted Imaging (SWI) were acquired for the Verrall study, but not used for this retrospective analysis.

The 3D T1-weighted images were used for brain volumetric analysis. These were acquired using the 3D Magnetization Prepared Rapid Gradient Echo (MPRAGE) sequence at the RCH, RPAH and CHW sites (in-plane voxel resolution ~0.45 to 0.94 mm; slice thickness = 0.9 mm; TR = 1680 to 2530 ms; TE = 1.77 to 2.45 ms; FOV ~ 230 x 230 mm; Flip angle = 7 to 9 degrees); and the 3D Magnetization Prepared 2 Rapid Gradient Echo (MP2RAGE) sequence for the NZ site (1.0mm isotropic voxel resolution; TR = 5000msec; TE = 2.50msec; FOV = 256 x 256mm; Flip angle = 0 degree).

Please refer to the ABIDE I and II and PING data repository websites and publications for acquisition parameter details, and the criteria used for the recruited healthy control subjects.

#### *Pituitary Gland Segmentation Protocol*

Pituitary segmentation described by Farrow et al., 2020:

*“Pituitary gland tracing is performed in the coronal planes, given it provides the best visualization of the pituitary gland (Garner et al., 2005; Lorenzetti et al., 2009). The borders of pituitary gland are defined by the diaphragm sellae superiorly, the sphenoid sinus inferiorly, and the cavernous sinuses bilaterally. The infundibular stalk is excluded from the tracing (Ganella et al., 2015; Whittle et al., 2012). The whole pituitary gland tracing is then subsequently split into anterior and posterior lobes. The difference between the darker (i.e. T1-weighted isointense) anterior lobe and T1-weighted hyperintense posterior lobe is typically easily identifiable. This division is first identified in the coronal plane, but for cases where the divide is not parallel with a coronal slice, further editing is performed in the sagittal plane, where the boundary could be clarified.” (Figure 1).*

Note in this protocol, the anterior pituitary gland tracing includes both the *pars distalis* and *pars intermedia*, but excludes the *pars tuberalis* which forms part of infundibulum/pituitary stalk.

SUPPLEMENTAL TABLES:

**Table 2a: Clinical and Demographic Characteristics of Participants (with age group stratification)**

|                            | Total |             | Fontan |             |    |             | p      | Total |            | Control |            |    |           | p      |
|----------------------------|-------|-------------|--------|-------------|----|-------------|--------|-------|------------|---------|------------|----|-----------|--------|
|                            | N     | Mean (SD)   | N      | Mean (SD)   | N  | Mean (SD)   |        | N     | Mean (SD)  | N       | Mean (SD)  | N  | Mean (SD) |        |
| <b>Age_yr</b>              | 85    | 23.0 (7.9)  | 28     | 15.4 (1.5)  | 57 | 26.8 (6.9)  | <.0001 | 86    | 23.0 (8.2) | 29      | 15.3 (1.5) | 57 | 27 (7.3)  | <.0001 |
| <b>Ht_centile</b>          | 83    | 42.1 (30.4) | 28     | 33.9 (28.9) | 55 | 46.3 (30.5) | 0.0783 |       |            |         |            |    |           |        |
| <b>BMI</b>                 | 83    | 23.5 (5.1)  | 28     | 21.3 (4.9)  | 55 | 24.7 (4.8)  | 0.0034 |       |            |         |            |    |           |        |
| <b>Age1st_surgery_days</b> | 83    | 201.2 (378) | 28     | 86.8 (133)  | 55 | 260 (445)   | 0.0483 |       |            |         |            |    |           |        |
| <b>Time_Fontan_MRI_yr</b>  | 85    | 16.9 (6.5)  | 28     | 10.4 (1.8)  | 57 | 20.1 (5.6)  | <.0001 |       |            |         |            |    |           |        |
| <b>Age_at_Fontan_yrs</b>   | 84    | 6.2 (4.6)   | 28     | 4.9 (1.0)   | 56 | 6.8 (5.5)   | 0.0778 |       |            |         |            |    |           |        |

**Table 2b: Clinical and Demographic Characteristics of Participants (with age group stratification)**

|                                         |                  | Fontan           |                     |                     | Control  |                |                     |                     |        |
|-----------------------------------------|------------------|------------------|---------------------|---------------------|----------|----------------|---------------------|---------------------|--------|
|                                         |                  | Total<br>N (%)   | Age < 18 y<br>N (%) | Age ≥ 18 y<br>N (%) | p        | Total<br>N (%) | Age < 18 y<br>N (%) | Age ≥ 18 y<br>N (%) | p      |
|                                         | Total            | 85 (100)         | 28 (32.94)          | 57 (67.06)          |          | 86 (100)       | 29 (33.72)          | 57 (66.28)          |        |
| <b>Sex</b>                              | F                | 37 (43.53)       | 9 (32.14)           | 28 (49.12)          | 0.1667   | 37 (43.02)     | 9 (31.03)           | 28 (49.12)          | 0.1664 |
|                                         | M                | 48 (56.47)       | 19 (67.86)          | 29 (50.88)          |          | 49 (56.98)     | 20 (68.97)          | 29 (50.88)          |        |
| <b>No_operations_prior_Fontan</b>       |                  |                  |                     |                     |          |                |                     |                     |        |
|                                         | 0                | 1 (1.18)         | 0 (0)               | 1 (1.75)            | 0.1107   |                |                     |                     |        |
|                                         | 1                | 25 (29.41)       | 4 (14.29)           | 21 (36.84)          |          |                |                     |                     |        |
|                                         | 2                | 32 (37.65)       | 16 (57.14)          | 16 (28.07)          |          |                |                     |                     |        |
|                                         | 3                | 16 (18.82)       | 5 (17.86)           | 11 (19.3)           |          |                |                     |                     |        |
|                                         | 4                | 9 (10.59)        | 3 (10.71)           | 6 (10.53)           |          |                |                     |                     |        |
|                                         | 5                | 2 (2.35)         | 0 (0)               | 2 (3.51)            |          |                |                     |                     |        |
| <b>Predominant_ventricular_morpholo</b> |                  |                  |                     |                     |          |                |                     |                     |        |
|                                         | Biventricular    | 6 (7.06)         | 3 (10.71)           | 3 (5.26)            | 0.7065   |                |                     |                     |        |
|                                         | Indeterminate    | 5 (5.88)         | 1 (3.57)            | 4 (7.02)            |          |                |                     |                     |        |
|                                         | Left             | 49 (57.65)       | 15 (53.57)          | 34 (59.65)          |          |                |                     |                     |        |
|                                         | Right            | 25 (29.41)       | 9 (32.14)           | 16 (28.07)          |          |                |                     |                     |        |
| <b>Fontan_Type Age_gp</b>               |                  |                  |                     |                     |          |                |                     |                     |        |
|                                         | AP               | 9 (10.71)        | 0 (0)               | 9 (16.07)           | 0.0003   |                |                     |                     |        |
| <b>(this p-value is not meaningful)</b> |                  | APconvertedtoECC | 1 (1.19)            | 0 (0)               | 1 (1.79) |                |                     |                     |        |
|                                         | ECC              | 56 (66.67)       | 28 (100)            | 28 (50)             |          |                |                     |                     |        |
|                                         | LT               | 17 (20.24)       | 0 (0)               | 17 (30.36)          |          |                |                     |                     |        |
|                                         | LTconvertedtoECC | 1 (1.19)         | 0 (0)               | 1 (1.79)            |          |                |                     |                     |        |
| <b>Presence_PLE Age_gp</b>              |                  |                  |                     |                     |          |                |                     |                     |        |
|                                         | Yes              | 1 (1.2)          | 1 (3.7)             | 0 (0)               | 0.3253   |                |                     |                     |        |
|                                         | No               | 82 (98.8)        | 26 (96.3)           | 56 (100)            |          |                |                     |                     |        |

**Table 3 (complete with age stratification): Absolute and Normalized Pituitary and Hypothalamus Volumetric Measurements**

|                                 | <i>Fontan</i> |                 |            |                 |            |                 | <i>Control</i> |                 |            |                 |            |                 |
|---------------------------------|---------------|-----------------|------------|-----------------|------------|-----------------|----------------|-----------------|------------|-----------------|------------|-----------------|
|                                 | Total         |                 | Age < 18 y |                 | Age ≥ 18 y |                 | Total          |                 | Age < 18 y |                 | Age ≥ 18 y |                 |
|                                 | N             | Mean (SD)       | N          | Mean (SD)       | N          | Mean (SD)       | N              | Mean (SD)       | N          | Mean (SD)       | N          | Mean (SD)       |
| <i>TPV</i>                      | 85            | 596.74 (134.09) | 28         | 561.82 (142.91) | 57         | 613.89 (127.34) | 86             | 526.94 (132.33) | 29         | 499.03 (149.8)  | 57         | 541.14 (121.45) |
| <i>APV</i>                      | 64            | 480.14 (118.07) | 20         | 424.5 (117.54)  | 44         | 505.43 (110.57) | 86             | 419.34 (114.8)  | 29         | 393.79 (132.95) | 57         | 432.33 (103.24) |
| <i>PPV</i>                      | 64            | 103.02 (46.39)  | 20         | 93.75 (38.39)   | 44         | 107.23 (49.43)  | 86             | 107.62 (45.56)  | 29         | 105.24 (39.36)  | 57         | 108.82 (48.7)   |
| <i>TPV_norm</i>                 | 85            | 5.55 (1.54)     | 28         | 5.22 (1.73)     | 57         | 5.72 (1.42)     | 86             | 4.38 (1.11)     | 29         | 4.11 (1.24)     | 57         | 4.51 (1.02)     |
| <i>APV_norm</i>                 | 64            | 4.31 (1.22)     | 20         | 3.66 (1.14)     | 44         | 4.60 (1.16)     | 86             | 3.48 (0.97)     | 29         | 3.24 (1.07)     | 57         | 3.61 (0.90)     |
| <i>PPV_norm</i>                 | 64            | 0.92 (0.43)     | 20         | 0.79 (0.30)     | 44         | 0.97 (0.46)     | 86             | 0.89 (0.37)     | 29         | 0.87 (0.34)     | 57         | 0.09 (0.38)     |
| <i>RHV</i>                      | 86            | 384.1 (47.9)    | 29         | 378.2 (56.5)    | 57         | 387.1 (43.1)    | 86             | 388 (59.3)      | 29         | 386.6 (64.6)    | 57         | 388.7 (57.0)    |
| <i>R_anterior_inferior_hypo</i> | 86            | 13.95 (5.85)    | 29         | 13.03 (5.88)    | 57         | 14.42 (5.84)    | 86             | 12.53 (7.05)    | 29         | 11.07 (6.18)    | 57         | 13.28 (7.4)     |
| <i>R_anterior_superior_hypo</i> | 86            | 21.51 (4.86)    | 29         | 21.41 (5.25)    | 57         | 21.56 (4.69)    | 86             | 19.16 (6.76)    | 29         | 17.93 (6.46)    | 57         | 19.79 (6.88)    |
| <i>R_posterior_hypo</i>         | 86            | 108.55 (21.82)  | 29         | 105.48 (27.43)  | 57         | 110.11 (18.42)  | 86             | 119.48 (20.56)  | 29         | 126.31 (20.55)  | 57         | 116 (19.84)     |
| <i>R_tubular_inferior_hypo</i>  | 86            | 129.24 (15.27)  | 29         | 126.76 (15.09)  | 57         | 130.51 (15.34)  | 86             | 126.37 (25.27)  | 29         | 124.24 (28.09)  | 57         | 127.46 (23.89)  |
| <i>R_tubular_superior_hypo</i>  | 86            | 110.84 (15.31)  | 29         | 111.55 (18.89)  | 57         | 110.47 (13.31)  | 86             | 110.45 (20.03)  | 29         | 107.03 (25.77)  | 57         | 112.19 (16.37)  |
| <i>LHV</i>                      | 86            | 392.0 (45.6)    | 29         | 386.1 (57.3)    | 57         | 395 (38.6)      | 86             | 400.8 (50.1)    | 29         | 394.6 (49.4)    | 57         | 403.9 (50.6)    |
| <i>L_anterior_inferior_hypo</i> | 86            | 14.53 (5.11)    | 29         | 11.9 (5.17)     | 57         | 15.88 (4.56)    | 86             | 13.8 (5.86)     | 29         | 11.1 (5.86)     | 57         | 15.18 (5.41)    |
| <i>L_anterior_superior_hypo</i> | 86            | 20.49 (4.05)    | 29         | 19.79 (4.11)    | 57         | 20.84 (4.02)    | 86             | 20.34 (5.66)    | 29         | 19.1 (5.60)     | 57         | 20.96 (5.64)    |
| <i>L_posterior_hypo</i>         | 86            | 106.58 (19.44)  | 29         | 105.9 (26.38)   | 57         | 106.93 (15.0)   | 86             | 114.45 (17.59)  | 29         | 115.59 (17.26)  | 57         | 113.88 (17.89)  |
| <i>L_tubular_inferior_hypo</i>  | 86            | 140.08 (16.86)  | 29         | 141.24 (18.23)  | 57         | 139.49 (16.26)  | 86             | 140.55 (20.92)  | 29         | 138.83 (18.65)  | 57         | 141.42 (22.1)   |

|                                |    |                |    |                |    |                |    |                |    |             |    |                |
|--------------------------------|----|----------------|----|----------------|----|----------------|----|----------------|----|-------------|----|----------------|
| <i>L_tubular_superior_hypo</i> | 86 | 110.35 (15.34) | 29 | 107.31 (18.73) | 57 | 111.89 (13.22) | 86 | 111.62 (15.52) | 29 | 110 (14.82) | 57 | 112.44 (15.92) |
| <i>RHV_norm</i>                | 86 | 3.51 (0.36)    | 29 | 3.41 (0.42)    | 57 | 3.57 (0.32)    | 86 | 3.21 (0.49)    | 29 | 3.17 (0.53) | 57 | 3.24 (0.47)    |
| <i>R_ant_inf_norm</i>          | 86 | 0.13 (0.05)    | 29 | 0.12 (0.05)    | 57 | 0.13 (0.05)    | 86 | 0.1 (0.06)     | 29 | 0.09 (0.05) | 57 | 0.11 (0.06)    |
| <i>R_ant_sup_norm</i>          | 86 | 0.2 (0.04)     | 29 | 0.19 (0.05)    | 57 | 0.20 (0.04)    | 86 | 0.16 (0.05)    | 29 | 0.15 (0.05) | 57 | 0.16 (0.06)    |
| <i>R_post_norm</i>             | 86 | 0.99 (0.18)    | 29 | 0.95 (0.23)    | 57 | 1.01 (0.15)    | 86 | 0.99 (0.18)    | 29 | 1.04 (0.18) | 57 | 0.97 (0.17)    |
| <i>R_tub_inf_norm</i>          | 86 | 1.18 (0.13)    | 29 | 1.15 (0.15)    | 57 | 1.2 (0.11)     | 86 | 1.04 (0.20)    | 29 | 1.02 (0.23) | 57 | 1.06 (0.18)    |
| <i>R_tub_sup_norm</i>          | 86 | 1.02 (0.13)    | 29 | 1.01 (0.14)    | 57 | 1.02 (0.13)    | 86 | 0.92 (0.17)    | 29 | 0.88 (0.21) | 57 | 0.94 (0.14)    |
| <i>LHV_norm</i>                | 86 | 3.59 (0.38)    | 29 | 3.49 (0.47)    | 57 | 3.64 (0.31)    | 86 | 3.32 (0.40)    | 29 | 3.23 (0.37) | 57 | 3.36 (0.41)    |
| <i>L_ant_inf_norm</i>          | 86 | 0.13 (0.05)    | 29 | 0.11 (0.04)    | 57 | 0.15 (0.04)    | 86 | 0.11 (0.05)    | 29 | 0.09 (0.05) | 57 | 0.13 (0.05)    |
| <i>L_ant_sup_norm</i>          | 86 | 0.19 (0.04)    | 29 | 0.18 (0.04)    | 57 | 0.19 (0.04)    | 86 | 0.17 (0.05)    | 29 | 0.16 (0.04) | 57 | 0.17 (0.05)    |
| <i>L_post_norm</i>             | 86 | 0.97 (0.16)    | 29 | 0.95 (0.2)     | 57 | 0.99 (0.13)    | 86 | 0.95 (0.15)    | 29 | 0.95 (0.13) | 57 | 0.95 (0.15)    |
| <i>L_tub_inf_norm</i>          | 86 | 1.28 (0.15)    | 29 | 1.28 (0.19)    | 57 | 1.29 (0.13)    | 86 | 1.16 (0.16)    | 29 | 1.14 (0.14) | 57 | 1.18 (0.17)    |
| <i>L_tub_sup_norm</i>          | 86 | 1.01 (0.14)    | 29 | 0.97 (0.17)    | 57 | 1.03 (0.12)    | 86 | 0.93 (0.13)    | 29 | 0.9 (0.12)  | 57 | 0.94 (0.13)    |

**Table 4a: Mean Differences in Pituitary and Hypothalamus Volumes Between Groups (with interaction term for age)**

|                                 | Group   | Estimate (SE) | 95% CI        | p for Group | Age_g p | Estimate (SE) | 95% CI         | p for Age | p for Group * Age |
|---------------------------------|---------|---------------|---------------|-------------|---------|---------------|----------------|-----------|-------------------|
| <b>TPV</b>                      | Fontan  | 62.8 (35)     | -6.3 - 131.9  | 0.0746      | 18<=    | 42.1 (30.1)   | -17.4 - 101.6  | 0.1641    | 0.8164            |
|                                 | Control | 0             | 0             |             | <18     | 0             | 0              |           |                   |
| <b>APV</b>                      | Fontan  | 30.7 (33)     | -34.5 - 95.9  | 0.3534      | 18<=    | 38.5 (25.9)   | -12.6 - 89.7   | 0.1386    | 0.292             |
|                                 | Control | 0             | 0             |             | <18     | 0             | 0              |           |                   |
| <b>PPV</b>                      | Fontan  | -11.5 (13.4)  | -37.9 - 14.9  | 0.3917      | 18<=    | 3.58 (10.5)   | -17.2 - 24.3   | 0.7334    | 0.5437            |
|                                 | Control | 0             | 0             |             | <18     | 0             | 0              |           |                   |
| <b>TPV_norm</b>                 | Fontan  | 1.12 (0.35)   | 0.42 - 1.81   | 0.0018      | 18<=    | 0.41 (0.3)    | -0.19 - 1.01   | 0.1803    | 0.838             |
|                                 | Control | 0             | 0             |             | <18     | 0             | 0              |           |                   |
| <b>APV_norm</b>                 | Fontan  | 0.43 (0.3)    | -0.17 - 1.03  | 0.1612      | 18<=    | 0.37 (0.24)   | -0.1 - 0.84    | 0.1197    | 0.1289            |
|                                 | Control | 0             | 0             |             | <18     | 0             | 0              |           |                   |
| <b>PPV_norm</b>                 | Fontan  | -0.08 (0.11)  | -0.3 - 0.15   | 0.4991      | 18<=    | 0.04 (0.09)   | -0.14 - 0.21   | 0.6932    | 0.2871            |
|                                 | Control | 0             | 0             |             | <18     | 0             | 0              |           |                   |
| <b>RHV</b>                      | Fontan  | -8.34 (14.2)  | -36.4 - 19.7  | 0.5579      | 18<=    | 2.13 (12.3)   | -22.3 - 26.5   | 0.8630    | 0.7018            |
|                                 | Control | 0             | 0             |             | <18     | 0             | 0              |           |                   |
| <b>R_anterior_inferior_hypo</b> | Fontan  | 1.97 (1.7)    | -1.38 - 5.31  | 0.2483      | 18<=    | 2.21 (1.47)   | -0.7 - 5.12    | 0.1353    | 0.6926            |
|                                 | Control | 0             | 0             |             | <18     | 0             | 0              |           |                   |
| <b>R_anterior_superior_hypo</b> | Fontan  | 3.48 (1.55)   | 0.43 - 6.54   | 0.0256      | 18<=    | 1.86 (1.34)   | -0.79 - 4.51   | 0.1684    | 0.3692            |
|                                 | Control | 0             | 0             |             | <18     | 0             | 0              |           |                   |
| <b>R_posterior_hypo</b>         | Fontan  | -20.83 (5.51) | -31.7 - -9.95 | 0.0002      | 18<=    | -10.31 (4.79) | -19.76 - -0.86 | 0.0326    | 0.0287            |
|                                 | Control | 0             | 0             |             | <18     | 0             | 0              |           |                   |

|                                 |         |                 |                |        |      |              |               |        |        |
|---------------------------------|---------|-----------------|----------------|--------|------|--------------|---------------|--------|--------|
|                                 | Control | 0               | 0              |        | <18  | 0            | 0             |        |        |
| <b>R_tubular_inferior_hypo</b>  | Fontan  | 2.52<br>(5.5)   | -8.34 - 13.37  | 0.6476 | 18<= | 3.21 (4.77)  | -6.21 - 12.64 | 0.5017 | 0.9369 |
|                                 | Control | 0               | 0              |        | <18  | 0            | 0             |        |        |
| <b>R_tubular_superior_hypo</b>  | Fontan  | 4.52<br>(4.69)  | -4.74 - 13.77  | 0.3365 | 18<= | 5.16 (4.07)  | -2.88 - 13.19 | 0.2068 | 0.2802 |
|                                 | Control | 0               | 0              |        | <18  | 0            | 0             |        |        |
| <b>LHV</b>                      | Fontan  | -8.48<br>(12.6) | -33.4 - 16.4   | 0.5020 | 18<= | 9.26 (11.0)  | -12.4 - 30.9  | 0.4000 | 0.9815 |
|                                 | Control | 0               | 0              |        | <18  | 0            | 0             |        |        |
| <b>L_anterior_inferior_hypo</b> | Fontan  | 0.79<br>(1.36)  | -1.89 - 3.48   | 0.5608 | 18<= | 4.07 (1.18)  | 1.74 - 6.41   | 0.0007 | 0.9565 |
|                                 | Control | 0               | 0              |        | <18  | 0            | 0             |        |        |
| <b>L_anterior_superior_hypo</b> | Fontan  | 0.69<br>(1.29)  | -1.85 - 3.23   | 0.5927 | 18<= | 1.86 (1.12)  | -0.34 - 4.07  | 0.0976 | 0.6079 |
|                                 | Control | 0               | 0              |        | <18  | 0            | 0             |        |        |
| <b>L_posterior_hypo</b>         | Fontan  | -9.69<br>(4.89) | -19.35 - -0.03 | 0.0494 | 18<= | -1.71 (4.25) | -10.1 - 6.68  | 0.6882 | 0.6489 |
|                                 | Control | 0               | 0              |        | <18  | 0            | 0             |        |        |
| <b>L_tubular_inferior_hypo</b>  | Fontan  | 2.41<br>(5.01)  | -7.48 - 12.31  | 0.6307 | 18<= | 2.59 (4.35)  | -6 - 11.19    | 0.5521 | 0.4815 |
|                                 | Control | 0               | 0              |        | <18  | 0            | 0             |        |        |
| <b>L_tubular_superior_hypo</b>  | Fontan  | -2.69<br>(4.05) | -10.69 - 5.31  | 0.5075 | 18<= | 2.44 (3.52)  | -4.51 - 9.38  | 0.4891 | 0.6668 |
|                                 | Control | 0               | 0              |        | <18  | 0            | 0             |        |        |
| <b>LHV_norm</b>                 | Fontan  | 0.26<br>(0.10)  | 0.06 - 0.45    | 0.0125 | 18<= | 0.13 (0.09)  | -0.04 - 0.30  | 0.1370 | 0.8563 |
|                                 | Control | 0               | 0              |        | <18  | 0            | 0             |        |        |
| <b>L_ant_inf_norm</b>           | Fontan  | 0.015           | -0.008 - 0.038 | 0.1891 | 18<= | 0.036 (0.01) | 0.016 - 0.056 | 0.0004 | 0.7905 |

|                       |         |                   |                |        |      |               |                    |        |        |
|-----------------------|---------|-------------------|----------------|--------|------|---------------|--------------------|--------|--------|
|                       | Control | (0.012)<br>0      | 0              |        | <18  | 0             | 0                  |        |        |
| <b>L_ant_sup_norm</b> | Fontan  | 0.025<br>(0.011)  | 0.003 - 0.046  | 0.027  | 18<= | 0.019 (0.01)  | -0.0003 -<br>0.038 | 0.054  | 0.5967 |
|                       | Control | 0                 | 0              |        | <18  | 0             | 0                  |        |        |
| <b>L_post_norm</b>    | Fontan  | 0.003<br>(0.04)   | -0.075 - 0.082 | 0.932  | 18<= | 0.003 (0.034) | -0.065 - 0.071     | 0.9363 | 0.5072 |
|                       | Control | 0                 | 0              |        | <18  | 0             | 0                  |        |        |
| <b>L_tub_inf_norm</b> | Fontan  | 0.144<br>(0.041)  | 0.063 - 0.225  | 0.0006 | 18<= | 0.039 (0.036) | -0.032 - 0.11      | 0.2763 | 0.4896 |
|                       | Control | 0                 | 0              |        | <18  | 0             | 0                  |        |        |
| <b>L_tub_sup_norm</b> | Fontan  | 0.068<br>(0.035)  | -0.001 - 0.136 | 0.0541 | 18<= | 0.035 (0.03)  | -0.025 - 0.094     | 0.2551 | 0.5054 |
|                       | Control | 0                 | 0              |        | <18  | 0             | 0                  |        |        |
| <b>RHV_norm</b>       | Fontan  | 0.24<br>(0.11)    | 0.02 - 0.47    | 0.0316 | 18<= | 0.07 (0.10)   | -0.12 - 0.26       | 0.4817 | 0.5460 |
|                       | Control | 0                 | 0              |        | <18  | 0             | 0                  |        |        |
| <b>R_ant_inf_norm</b> | Fontan  | 0.025<br>(0.014)  | -0.003 - 0.053 | 0.0765 | 18<= | 0.021 (0.012) | -0.003 - 0.045     | 0.0876 | 0.7959 |
|                       | Control | 0                 | 0              |        | <18  | 0             | 0                  |        |        |
| <b>R_ant_sup_norm</b> | Fontan  | 0.047<br>(0.013)  | 0.022 - 0.073  | 0.0003 | 18<= | 0.019 (0.011) | -0.003 - 0.041     | 0.0949 | 0.3892 |
|                       | Control | 0                 | 0              |        | <18  | 0             | 0                  |        |        |
| <b>R_post_norm</b>    | Fontan  | -0.089<br>(0.046) | -0.181 - 0.003 | 0.0577 | 18<= | -0.07 (0.04)  | -0.15 - 0.009      | 0.0831 | 0.0196 |
|                       | Control | 0                 | 0              |        | <18  | 0             | 0                  |        |        |
| <b>R_tub_inf_norm</b> | Fontan  | 0.132<br>(0.043)  | 0.047 - 0.218  | 0.0027 | 18<= | 0.042 (0.038) | -0.032 - 0.116     | 0.2661 | 0.8526 |
|                       | Control | 0                 | 0              |        | <18  | 0             | 0                  |        |        |



|                       |         |                 |              |        |      |               |                |        |        |
|-----------------------|---------|-----------------|--------------|--------|------|---------------|----------------|--------|--------|
| <b>R_tub_sup_norm</b> | Fontan  | 0.128<br>(0.04) | 0.05 - 0.206 | 0.0015 | 18<= | 0.057 (0.034) | -0.011 - 0.125 | 0.0970 | 0.3809 |
|                       | Control | 0               | 0            |        | <18  | 0             | 0              |        |        |

**Table 4b: Mean Differences in Pituitary and Hypothalamus Volumes Between Groups (WITHOUT interaction term for age)**

|                                 | Group   | Estimate (SE) | 95% CI         | p      | Age_gp | Estimate (SE) | 95% CI        | p      |
|---------------------------------|---------|---------------|----------------|--------|--------|---------------|---------------|--------|
| <b>TPV</b>                      | Fontan  | 69.4 (20.1)   | 29.7 - 109.2   | 0.0007 | 18<=   | 47 (21.4)     | 4.85 - 89.2   | 0.0291 |
|                                 | Control | 0             | 0              |        | <18    | 0             | 0             |        |
| <b>APV</b>                      | Fontan  | 59.4 (18.7)   | 22.4 - 96.5    | 0.0019 | 18<=   | 56.2 (19.8)   | 17.1 - 95.3   | 0.0051 |
|                                 | Control | 0             | 0              |        | <18    | 0             | 0             |        |
| <b>PPV</b>                      | Fontan  | -4.79 (7.58)  | -19.8 - 10.2   | 0.5285 | 18<=   | 7.71 (8.00)   | -8.10 - 23.5  | 0.3367 |
|                                 | Control | 0             | 0              |        | <18    | 0             | 0             |        |
| <b>TPV_norm</b>                 | Fontan  | 1.17 (0.20)   | 0.77 - 1.57    | <.0001 | 18<=   | 0.45 (0.21)   | 0.03 - 0.88   | 0.0372 |
|                                 | Control | 0             | 0              |        | <18    | 0             | 0             |        |
| <b>APV_norm</b>                 | Fontan  | 0.81 (0.17)   | 0.47 - 1.15    | <.0001 | 18<=   | 0.61 (0.18)   | 0.25 - 0.97   | 0.0011 |
|                                 | Control | 0             | 0              |        | <18    | 0             | 0             |        |
| <b>PPV_norm</b>                 | Fontan  | 0.02 (0.06)   | -0.10 - 0.15   | 0.7232 | 18<=   | 0.1 (0.07)    | -0.04 - 0.23  | 0.1575 |
|                                 | Control | 0             | 0              |        | <18    | 0             | 0             |        |
| <b>RHV</b>                      | Fontan  | -3.91 (8.23)  | -20.2 - 12.3   | 0.6357 | 18<=   | 5.48 (8.71)   | -11.7 - 22.7  | 0.5299 |
|                                 | Control | 0             | 0              |        | <18    | 0             | 0             |        |
| <b>R_anterior_inferior_hypo</b> | Fontan  | 1.42 (0.98)   | -0.52 - 3.36   | 0.1507 | 18<=   | 1.8 (1.04)    | -0.25 - 3.85  | 0.0853 |
|                                 | Control | 0             | 0              |        | <18    | 0             | 0             |        |
| <b>R_anterior_superior_hypo</b> | Fontan  | 2.35 (0.9)    | 0.58 - 4.12    | 0.0097 | 18<=   | 1 (0.95)      | -0.87 - 2.88  | 0.2923 |
|                                 | Control | 0             | 0              |        | <18    | 0             | 0             |        |
| <b>R_posterior_hypo</b>         | Fontan  | -10.93 (3.24) | -17.32 - -4.54 | 0.0009 | 18<=   | -2.84 (3.42)  | -9.6 - 3.91   | 0.4071 |
|                                 | Control | 0             | 0              |        | <18    | 0             | 0             |        |
| <b>R_tubular_inferior_hypo</b>  | Fontan  | 2.87 (3.18)   | -3.41 - 9.16   | 0.3682 | 18<=   | 3.48 (3.37)   | -3.16 - 10.13 | 0.3024 |
|                                 | Control | 0             | 0              |        | <18    | 0             | 0             |        |
| <b>R_tubular_superior_hypo</b>  | Fontan  | 0.38 (2.72)   | -4.99 - 5.76   | 0.8881 | 18<=   | 2.04 (2.88)   | -3.64 - 7.73  | 0.4796 |
|                                 | Control | 0             | 0              |        | <18    | 0             | 0             |        |
| <b>LHV</b>                      | Fontan  | -8.72 (7.30)  | -23.1 - 5.69   | 0.2339 | 18<=   | 9.08 (7.72)   | -6.16 - 24.3  | 0.2414 |
|                                 | Control | 0             | 0              |        | <18    | 0             | 0             |        |

|                                 |         |               |                |        |      |               |                |        |
|---------------------------------|---------|---------------|----------------|--------|------|---------------|----------------|--------|
|                                 | Control | 0             | 0              |        | <18  | 0             | 0              |        |
| <b>L_anterior_inferior_hypo</b> | Fontan  | 0.73 (0.79)   | -0.82 - 2.29   | 0.3539 | 18<= | 4.03 (0.83)   | 2.38 - 5.67    | <.0001 |
|                                 | Control | 0             | 0              |        | <18  | 0             | 0              |        |
| <b>L_anterior_superior_hypo</b> | Fontan  | 0.15 (0.75)   | -1.32 - 1.62   | 0.8396 | 18<= | 1.46 (0.79)   | -0.1 - 3.01    | 0.0667 |
|                                 | Control | 0             | 0              |        | <18  | 0             | 0              |        |
| <b>L_posterior_hypo</b>         | Fontan  | -7.87 (2.84)  | -13.47 - -2.27 | 0.0061 | 18<= | -0.34 (3)     | -6.26 - 5.58   | 0.9104 |
|                                 | Control | 0             | 0              |        | <18  | 0             | 0              |        |
| <b>L_tubular_inferior_hypo</b>  | Fontan  | -0.47 (2.91)  | -6.2 - 5.27    | 0.873  | 18<= | 0.42 (3.07)   | -5.65 - 6.49   | 0.891  |
|                                 | Control | 0             | 0              |        | <18  | 0             | 0              |        |
| <b>L_tubular_superior_hypo</b>  | Fontan  | -1.27 (2.35)  | -5.9 - 3.36    | 0.5898 | 18<= | 3.51 (2.48)   | -1.39 - 8.41   | 0.1589 |
|                                 | Control | 0             | 0              |        | <18  | 0             | 0              |        |
| <b>LHV_norm</b>                 | Fontan  | 0.27 (0.06)   | 0.15 - 0.39    | <.0001 | 18<= | 0.14 (0.06)   | 0.02 - 0.26    | 0.0226 |
|                                 | Control | 0             | 0              |        | <18  | 0             | 0              |        |
| <b>L_ant_inf_norm</b>           | Fontan  | 0.018 (0.007) | 0.005 - 0.031  | 0.0088 | 18<= | 0.038 (0.007) | 0.024 - 0.052  | <.0001 |
|                                 | Control | 0             | 0              |        | <18  | 0             | 0              |        |
| <b>L_ant_sup_norm</b>           | Fontan  | 0.02 (0.006)  | 0.007 - 0.033  | 0.0022 | 18<= | 0.015 (0.007) | 0.002 - 0.028  | 0.0278 |
|                                 | Control | 0             | 0              |        | <18  | 0             | 0              |        |
| <b>L_post_norm</b>              | Fontan  | 0.025 (0.023) | -0.021 - 0.07  | 0.2813 | 18<= | 0.019 (0.024) | -0.029 - 0.067 | 0.437  |
|                                 | Control | 0             | 0              |        | <18  | 0             | 0              |        |
| <b>L_tub_inf_norm</b>           | Fontan  | 0.121 (0.024) | 0.074 - 0.168  | <.0001 | 18<= | 0.022 (0.025) | -0.028 - 0.071 | 0.3946 |
|                                 | Control | 0             | 0              |        | <18  | 0             | 0              |        |
| <b>L_tub_sup_norm</b>           | Fontan  | 0.087 (0.02)  | 0.047 - 0.126  | <.0001 | 18<= | 0.049 (0.021) | 0.007 - 0.091  | 0.0235 |
|                                 | Control | 0             | 0              |        | <18  | 0             | 0              |        |
| <b>RHV_norm</b>                 | Fontan  | 0.30 (0.07)   | 0.17 - 0.43    | <.0001 | 18<= | 0.11 (0.07)   | -0.03 - 0.25   | 0.1103 |
|                                 | Control | 0             | 0              |        | <18  | 0             | 0              |        |
| <b>R_ant_inf_norm</b>           | Fontan  | 0.022 (0.008) | 0.006 - 0.038  | 0.0073 | 18<= | 0.019 (0.009) | 0.002 - 0.036  | 0.0309 |

|                       |         |                |                |        |      |                |                |        |
|-----------------------|---------|----------------|----------------|--------|------|----------------|----------------|--------|
|                       | Control | 0              | 0              |        | <18  | 0              | 0              |        |
| <b>R_ant_sup_norm</b> | Fontan  | 0.038 (0.007)  | 0.024 - 0.053  | <.0001 | 18<= | 0.012 (0.008)  | -0.004 - 0.027 | 0.1321 |
|                       | Control | 0              | 0              |        | <18  | 0              | 0              |        |
| <b>R_post_norm</b>    | Fontan  | 0.0003 (0.027) | -0.054 - 0.054 | 0.9909 | 18<= | -0.003 (0.029) | -0.06 - 0.054  | 0.9139 |
|                       | Control | 0              | 0              |        | <18  | 0              | 0              |        |
| <b>R_tub_inf_norm</b> | Fontan  | 0.139 (0.025)  | 0.089 - 0.188  | <.0001 | 18<= | 0.047 (0.027)  | -0.005 - 0.099 | 0.0787 |
|                       | Control | 0              | 0              |        | <18  | 0              | 0              |        |
| <b>R_tub_sup_norm</b> | Fontan  | 0.099 (0.023)  | 0.054 - 0.145  | <.0001 | 18<= | 0.036 (0.024)  | -0.012 - 0.084 | 0.1400 |
|                       | Control | 0              | 0              |        | <18  | 0              | 0              |        |

**Table 4c: Mean Differences in Pituitary and Hypothalamus Volumes Between Groups with *Multivariable Regression for Age (continuous)***

|                 |              |         | Estimate (SE)  | 95% CI         | p             |
|-----------------|--------------|---------|----------------|----------------|---------------|
| <b>TPV_norm</b> | Group        | Fontan  | 4.79 (0.45)    | 3.90 - 5.68    | <.0001        |
|                 | Group        | Control | 3.79 (0.44)    | 2.92 - 4.66    |               |
|                 | Age_yr       |         | 0.025 (0.018)  | -0.010 - 0.061 | <b>0.0294</b> |
|                 | Age_yr*Group | Fontan  | 0.006 (0.026)  | -0.045 - 0.057 | 0.8165        |
|                 | Age_yr*Group | Control | 0              |                |               |
| <b>RHV_norm</b> | Group        | Fontan  | 3.43 (0.14)    | 3.14 - 3.71    | <.0001        |
|                 | Group        | Control | 3.16 (0.14)    | 2.89 - 3.44    |               |
|                 | Age_yr       |         | 0.002 (0.006)  | -0.009 - 0.014 | 0.4581        |
|                 | Age_yr*Group | Fontan  | 0.002 (0.008)  | -0.015 - 0.018 | 0.8505        |
|                 | Age_yr*Group | Control | 0              |                |               |
| <b>LHV_norm</b> | Group        | Fontan  | 3.47 (0.13)    | 3.22 - 3.73    | <.0001        |
|                 | Group        | Control | 3.18 (0.13)    | 2.93 - 3.42    |               |
|                 | Age_yr       |         | 0.006 (0.005)  | -0.004 - 0.016 | 0.1220        |
|                 | Age_yr*Group | Fontan  | -0.001 (0.007) | -0.016 - 0.014 | 0.8832        |
|                 | Age_yr*Group | Control | 0              |                |               |

**Table 5: Associations between clinical and demographic variables and pituitary and hypothalamus volumes**

|                 |                     | <b>Estimate (SE)</b> | <b>95% CI</b>    | <b>p</b> |
|-----------------|---------------------|----------------------|------------------|----------|
| <b>TPV_norm</b> | Time_Fontan_MRI_yr  | 0.0521 (0.0252)      | 0.0020 - 0.1022  | 0.0415   |
|                 | Age1st_surgery_days | -0.0005 (0.0004)     | -0.0014 - 0.0004 | 0.3056   |
|                 | BMI                 | 0.0307 (0.0338)      | -0.0365 - 0.0978 | 0.3661   |
|                 | Ht_centile          | 0.0069 (0.0056)      | -0.0043 - 0.018  | 0.2242   |
| <b>APV_norm</b> | Time_Fontan_MRI_yr  | 0.0677 (0.0206)      | 0.0266 - 0.1088  | 0.0016   |
|                 | Age1st_surgery_days | -0.0001 (0.0004)     | -0.001 - 0.0007  | 0.7562   |
|                 | BMI                 | 0.0483 (0.0318)      | -0.0153 - 0.1118 | 0.1338   |
|                 | Ht_centile          | 0.0127 (0.0051)      | 0.0024 - 0.023   | 0.0163   |
| <b>PPV_norm</b> | Time_Fontan_MRI_yr  | 0.0141 (0.0075)      | -0.001 - 0.0292  | 0.0668   |
|                 | Age1st_surgery_days | 0.0001 (0.0001)      | -0.0002 - 0.0004 | 0.4829   |
|                 | BMI                 | 0.0120 (0.0112)      | -0.0103 - 0.0343 | 0.2846   |
|                 | Ht_centile          | 0.0028 (0.0018)      | -0.0009 - 0.0065 | 0.1370   |
| <b>LHV_norm</b> | Time_Fontan_MRI_yr  | 0.0154 (0.0061)      | 0.0034 - 0.0275  | 0.0129   |
|                 | Age1st_surgery_days | 0 (0.0001)           | -0.0003 - 0.0002 | 0.7041   |
|                 | BMI                 | 0.0054 (0.0083)      | -0.0111 - 0.0218 | 0.5161   |
|                 | Ht_centile          | 0.0016 (0.0014)      | -0.0011 - 0.0043 | 0.2478   |
| <b>RHV_norm</b> | Time_Fontan_MRI_yr  | 0.0127 (0.0059)      | 0.0009 - 0.0244  | 0.0354   |
|                 | Age1st_surgery_days | -0.0001 (0.0001)     | -0.0003 - 0.0002 | 0.6068   |
|                 | BMI                 | -0.0035 (0.0080)     | -0.0195 - 0.0124 | 0.6594   |
|                 | Ht_centile          | 0.0007 (0.0013)      | -0.0019 - 0.0034 | 0.5815   |

**Figure 5: Normalized Pituitary Volumes with Duration of Fontan Circulation** (ie. Time between Fontan completion and MRI)

*Note that normalized pituitary volumes are a percentage of total brain volume scaled by a factor of 100.*

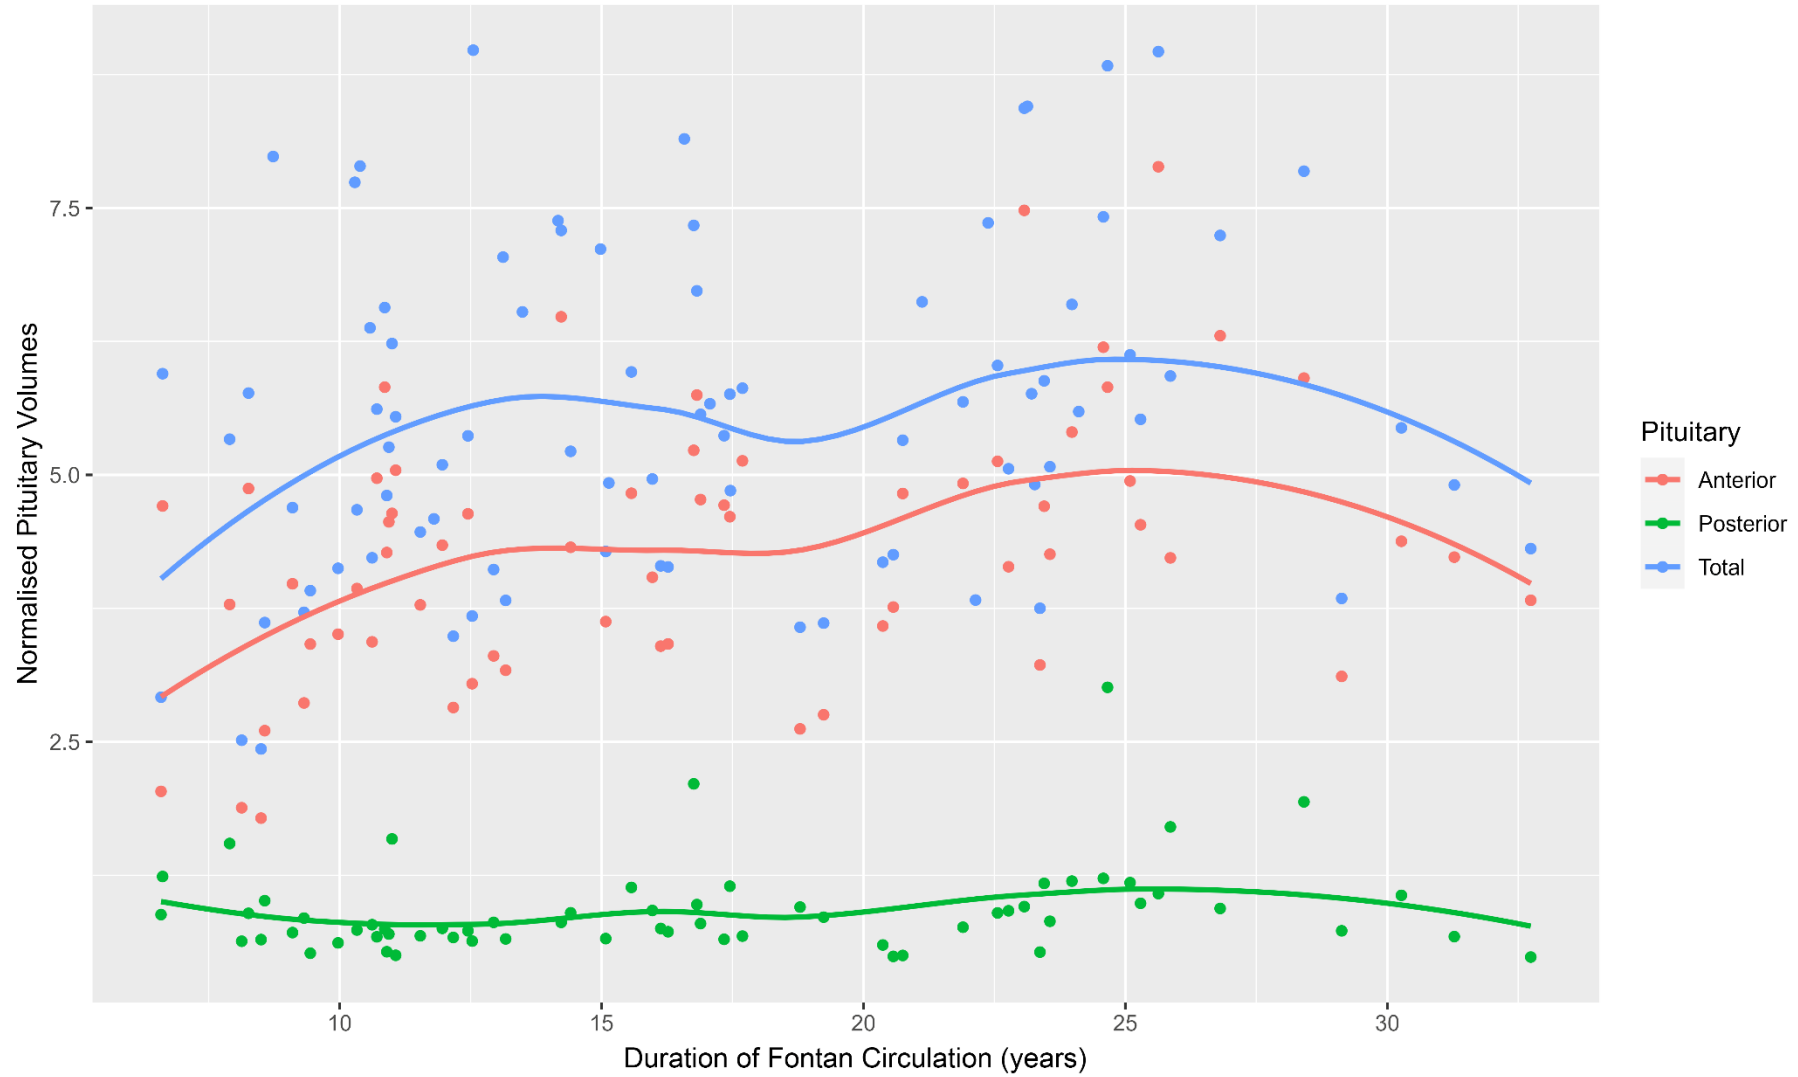

**Table 6: Associations between sex and pituitary and hypothalamus volumes (male vs female)**

| Variable | Sex | Fontan |             |             | Control |             |             | p-value for Group | p-value for Sex | p-value for Group*Sex |
|----------|-----|--------|-------------|-------------|---------|-------------|-------------|-------------------|-----------------|-----------------------|
|          |     | N      | Mean (SD)   | 95% CI      | N       | Mean (SD)   | 95% CI      |                   |                 |                       |
| TPV_norm | F   | 37     | 6.46 (1.32) | 6.02 - 6.9  | 37      | 5.14 (0.9)  | 4.84 - 5.44 | <.0001            | <.0001          | 0.4599                |
|          | M   | 48     | 4.86 (1.32) | 4.47 - 5.24 | 49      | 3.8 (0.89)  | 3.54 - 4.05 |                   |                 |                       |
| APV_norm | F   | 24     | 5.14 (1.08) | 4.69 - 5.6  | 37      | 4.18 (0.77) | 3.92 - 4.44 | <.0001            | <.0001          | 0.6868                |
|          | M   | 40     | 3.81 (1.02) | 3.48 - 4.13 | 49      | 2.96 (0.75) | 2.75 - 3.18 |                   |                 |                       |
| PPV_norm | F   | 24     | 1 (0.56)    | 0.77 - 1.24 | 37      | 0.96 (0.43) | 0.82 - 1.11 | 0.6946            | 0.0458          | 0.9363                |
|          | M   | 40     | 0.87 (0.32) | 0.76 - 0.97 | 49      | 0.84 (0.31) | 0.75 - 0.93 |                   |                 |                       |
| LHV_norm | F   | 37     | 3.66 (0.39) | 3.53 - 3.79 | 37      | 3.37 (0.37) | 3.24 - 3.49 | <.0001            | 0.0789          | 0.7497                |
|          | M   | 49     | 3.54 (0.36) | 3.43 - 3.64 | 49      | 3.28 (0.42) | 3.16 - 3.4  |                   |                 |                       |
| RHV_norm | F   | 37     | 3.56 (0.45) | 3.41 - 3.71 | 37      | 3.33 (0.41) | 3.2 - 3.47  | <.0001            | 0.0287          | 0.3241                |
|          | M   | 49     | 3.48 (0.29) | 3.40 - 3.56 | 49      | 3.12 (0.52) | 2.97 - 3.27 |                   |                 |                       |



**Table 7: Between group comparisons of the number of cardiac surgeries prior to Fontan completion, and pituitary and hypothalamus volumes.**

| Variable   | No_operations_prior_Fontan | N  | Mean (SD)     | p      |
|------------|----------------------------|----|---------------|--------|
| <b>TPV</b> | 0                          | 1  | 674.0         | 0.9536 |
|            | 1                          | 25 | 604.4 (129.5) |        |
|            | 2                          | 32 | 594.2 (147.8) |        |
|            | 3                          | 16 | 580.1 (125.7) |        |
|            | 4                          | 11 | 603.9 (134.7) |        |
| <b>APV</b> | 0                          | 1  | 544.0         | 0.6638 |
|            | 1                          | 18 | 496.3 (137.5) |        |
|            | 2                          | 27 | 467.5 (117.1) |        |
|            | 3                          | 11 | 452.0 (110.5) |        |
|            | 4                          | 7  | 522.4 (85.7)  |        |
| <b>PPV</b> | 0                          | 1  | 130.0         | 0.5140 |
|            | 1                          | 18 | 100.9 (38.1)  |        |
|            | 2                          | 27 | 105.4 (55.4)  |        |
|            | 3                          | 11 | 85.5 (20.7)   |        |
|            | 4                          | 7  | 123.1 (57.2)  |        |
| <b>LHV</b> | 0                          | 1  | 363.0         | 0.8086 |
|            | 1                          | 25 | 393.8 (42.5)  |        |
|            | 2                          | 33 | 396.4 (49.7)  |        |
|            | 3                          | 16 | 389.4 (49.9)  |        |
|            | 4                          | 11 | 381.3 (37.4)  |        |
| <b>RHV</b> | 0                          | 1  | 371.0         | 0.7769 |
|            | 1                          | 25 | 386.2 (45.8)  |        |
|            | 2                          | 33 | 386.1 (48.1)  |        |
|            | 3                          | 16 | 373.1 (52.7)  |        |

4

11

390.5 (51.1)

**Table 8: *Between group comparisons of predominant ventricular morphology and pituitary and hypothalamus volumes***

| <b>Variable</b> | <b>Predominant_ventricular_morphology</b> | <b>N</b> | <b>Mean (SD)</b> | <b>p</b> |
|-----------------|-------------------------------------------|----------|------------------|----------|
| <b>TPV</b>      | Biventricular                             | 6        | 610.5 (90.3)     | 0.8467   |
|                 | Indeterminate                             | 5        | 517.6 (143.3)    |          |
|                 | Left                                      | 49       | 601.3 (140.0)    |          |
|                 | Right                                     | 25       | 600.2 (131.2)    |          |
| <b>APV</b>      | Biventricular                             | 5        | 512.6 (96.2)     | 0.9952   |
|                 | Indeterminate                             | 5        | 422.0 (116.9)    |          |
|                 | Left                                      | 37       | 482.0 (117.5)    |          |
|                 | Right                                     | 17       | 483.6 (129.1)    |          |
| <b>PPV</b>      | Biventricular                             | 5        | 84.0 (6.4)       | 0.6936   |
|                 | Indeterminate                             | 5        | 96.0 (31.6)      |          |
|                 | Left                                      | 37       | 105.6 (51.8)     |          |
|                 | Right                                     | 17       | 104.9 (44.9)     |          |
| <b>LHV</b>      | Biventricular                             | 7        | 396.9 (38.5)     | 0.5372   |
|                 | Indeterminate                             | 5        | 409.0 (37.1)     |          |
|                 | Left                                      | 49       | 396.5 (45.0)     |          |
|                 | Right                                     | 25       | 378.5 (49.1)     |          |
| <b>RHV</b>      | Biventricular                             | 7        | 394.3 (32.8)     | 0.8891   |
|                 | Indeterminate                             | 5        | 406.6 (33.6)     |          |
|                 | Left                                      | 49       | 385.0 (52.2)     |          |
|                 | Right                                     | 25       | 375.0 (44.5)     |          |

**Table 9: Between group comparisons of Fontan Type and normalized pituitary and hypothalamus volumes**

|            | <b>Fontan_Type</b>  | <b>N</b> | <b>Mean (SD)</b> | <b>p</b> |
|------------|---------------------|----------|------------------|----------|
| <b>TPV</b> | AP                  | 9        | 653.2 (133.7)    | 0.7656   |
|            | AP converted to ECC | 1        | 454.0            |          |
|            | ECC                 | 56       | 584.5 (130.9)    |          |
|            | LT                  | 17       | 619.1 (146)      |          |
|            | LT converted to ECC | 1        | 656.0            |          |
| <b>APV</b> | AP                  | 9        | 541.7 (111.9)    | 0.9217   |
|            | AP converted to ECC | 1        | 403.0            |          |
|            | ECC                 | 42       | 460 (115.9)      |          |
|            | LT                  | 10       | 521.9 (125.6)    |          |
|            | LT converted to ECC | 1        | 525.0            |          |
| <b>PPV</b> | AP                  | 9        | 111.6 (39)       | 0.7189   |
|            | AP converted to ECC | 1        | 51.0             |          |
|            | ECC                 | 42       | 99.2 (36.6)      |          |
|            | LT                  | 10       | 114.8 (83.2)     |          |
|            | LT converted to ECC | 1        | 131.0            |          |
| <b>LHV</b> | AP                  | 9        | 393.8 (45.2)     | 0.9896   |
|            | AP converted to ECC | 1        | 339.0            |          |
|            | ECC                 | 57       | 391.6 (48.4)     |          |
|            | LT                  | 17       | 391.1 (38.1)     |          |
|            | LT converted to ECC | 1        | 433.0            |          |
| <b>RHV</b> | AP                  | 9        | 386.9 (47.5)     | 0.9695   |
|            | AP converted to ECC | 1        | 319.0            |          |
|            | ECC                 | 57       | 382.7 (49.8)     |          |
|            | LT                  | 17       | 384 (40.6)       |          |
|            | LT converted to ECC | 1        | 445.0            |          |
